# Supplementary material for: Two UV optical crystals with strong optical anisotropy, large band gaps and an α-BBO type structure
Source: Royal Society of Chemistry journal article supplement (doi:10.1039/d3dt00581j), 2023-01-01
Supplement: d3dt00581j1.pdf [file d3dt00581j1.pdf]

## **Two UV Optical Crystals with Strong Optical Anisotropy, Large Band Gaps and $\alpha$ -BBO Type Structure**

Lehui Liu,<sup>a,b</sup> Feifei Yuan<sup>a</sup>, Yisheng Huang<sup>a</sup>, Zhoubin Lin<sup>\*a, b</sup>, and Lizhen Zhang<sup>\*a</sup>

a. Key Laboratory of Optoelectronic Materials Chemistry and Physics, Fujian Institute of Research on the Structure of Matter, Chinese Academy of Sciences, Fuzhou, Fujian, 350002, P. R. China. E-mail: lzb@fjirsm.ac.cn.

b. University of Chinese Academy of Sciences, Beijing 100049, P. R. China.

**Table S1.** Crystal data and structure refinement for compounds **1** and **2**.

|                                                | Compound 1                                                      | Compound 2                                                      |
|------------------------------------------------|-----------------------------------------------------------------|-----------------------------------------------------------------|
| Formula                                        | C <sub>12</sub> H <sub>25</sub> N <sub>24</sub> PF <sub>6</sub> | C <sub>9</sub> H <sub>21</sub> N <sub>18</sub> OPF <sub>6</sub> |
| <i>D</i> calc./ g cm <sup>-3</sup>             | 1.709                                                           | 1.733                                                           |
| <i>m</i> /mm <sup>-1</sup>                     | 1.229                                                           | 2.137                                                           |
| Formula Weight                                 | 650.53                                                          | 542.41                                                          |
| Colour                                         | colourless                                                      | colourless                                                      |
| <i>T</i> /K                                    | 293(2)                                                          | 293(2)                                                          |
| Crystal System                                 | trigonal                                                        | monoclinic                                                      |
| Space Group                                    | <i>R</i> $\bar{3}$ <i>c</i>                                     | <i>P</i> 2 <sub>1</sub> / <i>n</i>                              |
| <i>a</i> /Å                                    | 10.8117(8)                                                      | 12.9123(3)                                                      |
| <i>b</i> /Å                                    | 10.8117(8)                                                      | 10.9021(2)                                                      |
| <i>c</i> /Å                                    | 37.472(4)                                                       | 15.2051(4)                                                      |
| <i>a</i> /°                                    | 90                                                              | 90                                                              |
| <i>b</i> /°                                    | 90                                                              | 103.770(2)                                                      |
| <i>g</i> /°                                    | 120                                                             | 90                                                              |
| <i>V</i> /Å <sup>3</sup>                       | 3793.4(7)                                                       | 2078.92(8)                                                      |
| <i>Z</i>                                       | 6                                                               | 4                                                               |
| <i>Z</i> '                                     | 0.166667                                                        | 1                                                               |
| Wavelength/Å                                   | 1.3405                                                          | 1.54184                                                         |
| Radiation type                                 | Ga <i>K</i> $\alpha$                                            | Cu <i>K</i> $\alpha$                                            |
| <i>Q</i> min/°                                 | 4.590                                                           | 2.992                                                           |
| <i>Q</i> max/°                                 | 60.579                                                          | 77.167                                                          |
| Measured Refl's.                               | 4249                                                            | 14828                                                           |
| Indep't Refl's                                 | 955                                                             | 4266                                                            |
| Refl's I $\geq$ 2 <i>s</i> (I)                 | 755                                                             | 3389                                                            |
| <i>R</i> int                                   | 0.0377                                                          | 0.0918                                                          |
| Parameters                                     | 98                                                              | 394                                                             |
| Restraints                                     | 0                                                               | 741                                                             |
| Largest Peak                                   | 0.354                                                           | 1.049                                                           |
| Deepest Hole                                   | -0.344                                                          | -1.087                                                          |
| GooF                                           | 1.046                                                           | 1.120                                                           |
| <i>wR</i> <sub>2</sub> (all data) <sup>a</sup> | 0.1465                                                          | 0.1935                                                          |
| <i>wR</i> <sub>2</sub>                         | 0.1368                                                          | 0.1833                                                          |
| <i>R</i> <sub>1</sub> (all data) <sup>b</sup>  | 0.0590                                                          | 0.1265                                                          |
| <i>R</i> <sub>1</sub>                          | 0.0491                                                          | 0.0790                                                          |

$$^a wR_2 = [\sum[w(F_o^2 - F_c^2)^2] / \sum[w(F_o^2)^2]]^{1/2}; \quad ^b R_1 = \sum||F_o| - |F_c|| / \sum|F_o|$$

**Table S2.** Fractional Atomic Coordinates ( $\times 10^4$ ) and Equivalent Isotropic Displacement Parameters ( $\text{\AA}^2 \times 10^3$ ) for compound **1**.  $U_{eq}$  is defined as  $1/3$  of the trace of the orthogonalized  $U_{ij}$ .

| Atom | x           | y           | z         | $U_{eq}$ |
|------|-------------|-------------|-----------|----------|
| N1   | 8644.3(14)  | -1175.2(13) | 5440.2(4) | 34.4(4)  |
| N2   | 7741.5(17)  | 336.6(18)   | 5439.1(5) | 45.2(5)  |
| C1   | 8876.0(16)  | 168.7(16)   | 5440.5(4) | 31.7(4)  |
| N3   | 9645.2(18)  | 2249.0(18)  | 6334.2(6) | 55.1(6)  |
| N4   | 11172.6(14) | 1362.5(14)  | 6332.1(4) | 37.5(4)  |
| C2   | 9823.0(17)  | 1106.2(17)  | 6332.3(5) | 35.4(4)  |
| P1   | 6666.67     | 3333.33     | 5833.33   | 33.7(4)  |
| F1   | 5669(13)    | 2299(10)    | 6113(3)   | 126(3)   |
| F2   | 7616(9)     | 4507(7)     | 6121(2)   | 77.2(16) |
| F3   | 7500(20)    | 2620(20)    | 5901(4)   | 201(7)   |

**Table S3.** Anisotropic Displacement Parameters ( $\times 10^4$ ) for compound **1**. The anisotropic displacement factor exponent takes the form:  $-2p^2/h^2a^* \times U_{11} + \dots + 2hka^* \times b^* \times U_{12}$ .

| Atom | $U_{11}$ | $U_{22}$ | $U_{33}$  | $U_{23}$ | $U_{13}$ | $U_{12}$  |
|------|----------|----------|-----------|----------|----------|-----------|
| N1   | 28.3(7)  | 27.9(7)  | 45.5(8)   | 0.1(6)   | 1.0(6)   | 13.1(5)   |
| N2   | 30.6(8)  | 35.8(8)  | 72.1(11)  | -2.5(7)  | -1.3(7)  | 18.8(6)   |
| C1   | 30.5(8)  | 31.0(8)  | 33.6(8)   | -0.8(6)  | -0.4(6)  | 15.4(6)   |
| N3   | 34.7(8)  | 29.9(8)  | 102.9(15) | 1.1(8)   | 1.1(9)   | 17.8(6)   |
| N4   | 28.7(7)  | 28.0(7)  | 54.3(9)   | 0.5(6)   | -0.5(6)  | 13.1(5)   |
| C2   | 31.0(8)  | 30.1(8)  | 45.1(9)   | -0.9(7)  | -0.3(7)  | 15.2(6)   |
| P1   | 26.1(4)  | 26.1(4)  | 48.9(6)   | 0        | 0        | 13.04(19) |
| F1   | 144(9)   | 72(5)    | 99(6)     | 37(4)    | 73(7)    | 8(5)      |
| F2   | 66(3)    | 58(3)    | 88(4)     | -30(3)   | -29(3)   | 16(3)     |
| F3   | 325(16)  | 289(14)  | 174(12)   | -35(17)  | -53(18)  | 291(15)   |

**Table S4.** Bond Lengths in  $\text{\AA}$  for compound **1**.

| Atom | Atom | Length/ $\text{\AA}$ | Atom | Atom | Length/ $\text{\AA}$ |
|------|------|----------------------|------|------|----------------------|
| N1   | C1   | 1.3454(19)           | P1   | F33  | 1.467(7)             |
| N1   | C11  | 1.3513(19)           | P1   | F35  | 1.467(7)             |
| N2   | C1   | 1.327(2)             | P1   | F36  | 1.467(7)             |
| N3   | C2   | 1.342(2)             | P1   | F34  | 1.467(7)             |
| N4   | C2   | 1.342(2)             | P1   | F37  | 1.467(7)             |
| N4   | C22  | 1.3455(19)           | F1   | F25  | 1.278(11)            |
| P1   | F1   | 1.520(5)             | F1   | F23  | 0.985(10)            |
| P1   | F13  | 1.520(5)             | F1   | F34  | 1.460(16)            |
| P1   | F14  | 1.520(5)             | F1   | F35  | 1.074(16)            |
| P1   | F15  | 1.520(5)             | F2   | F36  | 1.663(15)            |
| P1   | F16  | 1.520(5)             | F2   | F33  | 1.004(16)            |
| P1   | F17  | 1.520(5)             | F3   | F36  | 1.42(4)              |
| P1   | F3   | 1.467(7)             | F3   | F34  | 1.64(4)              |

11-y,-1+x-y,+z; 22+y-x,1-x,+z; 31-y,+x-y,+z; 44/3-x,2/3-x+y,7/6-z; 51+y-x,1-x,+z; 61/3-y+x,2/3-y,7/6-z; 71/3+y,-1/3+x,7/6-z

Table S5. Bond Angles in ° for compound 1.

| Atom | Atom | Atom | Angle/°    | Atom | Atom | Atom | Angle/°   |
|------|------|------|------------|------|------|------|-----------|
| C1   | N1   | C11  | 115.39(15) | F34  | P1   | F16  | 58.5(7)   |
| N1   | C1   | N12  | 124.61(14) | F33  | P1   | F1   | 135.0(10) |
| N2   | C1   | N12  | 117.87(14) | F37  | P1   | F36  | 117.1(3)  |
| N2   | C1   | N1   | 117.53(15) | F36  | P1   | F35  | 58(2)     |
| C2   | N4   | C22  | 114.11(15) | F33  | P1   | F37  | 117.0(3)  |
| N3   | C2   | N41  | 117.28(15) | F3   | P1   | F34  | 117.0(3)  |
| N3   | C2   | N4   | 116.83(16) | F3   | P1   | F33  | 58(2)     |
| N4   | C2   | N41  | 125.89(15) | F33  | P1   | F34  | 175(2)    |
| F13  | P1   | F14  | 87.5(9)    | F37  | P1   | F35  | 175(2)    |
| F13  | P1   | F15  | 135.2(10)  | F37  | P1   | F34  | 58(2)     |
| F16  | P1   | F1   | 87.5(9)    | F34  | P1   | F35  | 117.0(3)  |
| F15  | P1   | F14  | 77.5(7)    | F36  | P1   | F34  | 68(2)     |
| F17  | P1   | F1   | 135.2(10)  | F33  | P1   | F36  | 117.1(3)  |
| F17  | P1   | F13  | 77.5(7)    | F3   | P1   | F35  | 117.0(3)  |
| F17  | P1   | F15  | 87.4(9)    | F3   | P1   | F36  | 175(2)    |
| F16  | P1   | F14  | 135.2(10)  | F33  | P1   | F35  | 68.0(19)  |
| F17  | P1   | F14  | 140.0(12)  | F3   | P1   | F37  | 68(2)     |
| F1   | P1   | F14  | 77.5(7)    | F24  | F1   | P1   | 68.6(4)   |
| F13  | P1   | F1   | 140.0(12)  | F25  | F1   | P1   | 75.4(5)   |
| F17  | P1   | F16  | 77.5(7)    | F25  | F1   | F24  | 126.0(12) |
| F15  | P1   | F1   | 77.5(7)    | F24  | F1   | F37  | 74.4(10)  |
| F13  | P1   | F16  | 77.5(7)    | F25  | F1   | F34  | 58.2(13)  |
| F16  | P1   | F15  | 140.0(12)  | F25  | F1   | F37  | 118.4(15) |
| F37  | P1   | F16  | 42.1(7)    | F37  | F1   | P1   | 58.9(4)   |
| F37  | P1   | F1   | 58.5(7)    | F34  | F1   | P1   | 66.3(6)   |
| F3   | P1   | F14  | 119.4(9)   | F34  | F1   | F24  | 130.8(9)  |
| F36  | P1   | F17  | 119.4(9)   | F34  | F1   | F37  | 66(2)     |
| F34  | P1   | F13  | 100.1(11)  | P1   | F2   | F33  | 53.6(3)   |
| F34  | P1   | F17  | 135.0(10)  | F15  | F2   | P1   | 62.9(4)   |
| F34  | P1   | F14  | 83.7(10)   | F14  | F2   | P1   | 67.7(4)   |
| F35  | P1   | F16  | 135.0(10)  | F14  | F2   | F15  | 113.9(11) |
| F34  | P1   | F1   | 42.1(7)    | F14  | F2   | F33  | 117.4(8)  |
| F35  | P1   | F17  | 100.1(11)  | F14  | F2   | F35  | 65.3(12)  |
| F3   | P1   | F17  | 58.5(7)    | F15  | F2   | F33  | 57.8(7)   |
| F3   | P1   | F13  | 135.0(10)  | F35  | F2   | P1   | 64.3(5)   |
| F37  | P1   | F14  | 135.0(10)  | F35  | F2   | F15  | 121.2(13) |
| F3   | P1   | F15  | 42.1(7)    | F35  | F2   | F33  | 71(2)     |
| F33  | P1   | F16  | 119.4(9)   | P1   | F3   | F23  | 60.7(5)   |
| F33  | P1   | F15  | 58.5(7)    | P1   | F3   | F37  | 56.0(10)  |
| F36  | P1   | F1   | 100.1(11)  | F15  | F3   | P1   | 71.6(5)   |
| F37  | P1   | F15  | 100.1(11)  | F17  | F3   | P1   | 62.6(5)   |
| F35  | P1   | F1   | 119.4(9)   | F15  | F3   | F17  | 111.1(15) |
| F36  | P1   | F15  | 135.0(10)  | F15  | F3   | F23  | 132.2(8)  |
| F35  | P1   | F13  | 58.5(7)    | F17  | F3   | F23  | 47.8(7)   |
| F34  | P1   | F15  | 119.4(9)   | F17  | F3   | F37  | 79.8(13)  |
| F3   | P1   | F16  | 100.1(11)  | F15  | F3   | F33  | 70.0(19)  |
| F35  | P1   | F15  | 83.7(10)   | F15  | F3   | F37  | 113.4(18) |
| F33  | P1   | F14  | 100.1(11)  | F24  | F3   | P1   | 77.6(7)   |
| F33  | P1   | F13  | 83.7(10)   | F24  | F3   | F17  | 139.8(10) |
| F36  | P1   | F14  | 58.5(7)    | F24  | F3   | F15  | 56.5(8)   |
| F37  | P1   | F13  | 119.4(9)   | F24  | F3   | F23  | 108.6(19) |
| F35  | P1   | F14  | 42.1(7)    | F24  | F3   | F37  | 74(2)     |
| F36  | P1   | F13  | 42.1(7)    | F24  | F3   | F33  | 120.2(19) |
| F3   | P1   | F1   | 83.7(10)   | F33  | F3   | P1   | 61.0(10)  |
| F33  | P1   | F17  | 42.1(7)    | F33  | F3   | F17  | 43.7(10)  |
| F36  | P1   | F16  | 83.7(10)   | F33  | F3   | F23  | 87.5(11)  |
| F37  | P1   | F17  | 83.7(10)   | F37  | F3   | F23  | 35.4(7)   |

11-y,-1+x-y,+z; 22+y-x,1-x,+z; 31/3-y+x,2/3-y,7/6-z; 41+y-x,1-x,+z; 51-y,+x-y,+z; 61/3+y,-1/3+x,7/6-z; 74/3-x,2/3-x+y,7/6-z

**Table S6.** Torsion Angles in ° for compound 1.

| Atom | Atom | Atom | Atom | Angle/°    | Atom | Atom | Atom | Atom | Angle/°    |
|------|------|------|------|------------|------|------|------|------|------------|
| C11  | N1   | C1   | N12  | 0.2(3)     | F15  | P1   | F3   | F27  | 13.8(10)   |
| C11  | N1   | C1   | N2   | 179.79(11) | F15  | P1   | F3   | F23  | -106.2(12) |
| C22  | N4   | C2   | N3   | 179.63(12) | F17  | P1   | F3   | F27  | -68.6(13)  |
| C22  | N4   | C2   | N41  | -0.1(3)    | F14  | P1   | F3   | F23  | 58.5(8)    |
| F13  | P1   | F1   | F24  | 33.2(10)   | F1   | P1   | F3   | F23  | -19.9(18)  |
| F13  | P1   | F1   | F23  | -105.8(6)  | F1   | P1   | F3   | F27  | 100.0(6)   |
| F14  | P1   | F1   | F24  | 112.9(7)   | F16  | P1   | F3   | F37  | 50.0(10)   |
| F15  | P1   | F1   | F23  | 116.7(10)  | F14  | P1   | F3   | F36  | 137(2)     |
| F16  | P1   | F1   | F23  | 47.3(6)    | F16  | P1   | F3   | F36  | -96.3(13)  |
| F16  | P1   | F1   | F24  | -173.8(12) | F17  | P1   | F3   | F37  | 36.1(17)   |
| F14  | P1   | F1   | F23  | -26.0(10)  | F13  | P1   | F3   | F36  | 130.4(8)   |
| F17  | P1   | F1   | F24  | -37.3(10)  | F15  | P1   | F3   | F37  | 118.5(13)  |
| F15  | P1   | F1   | F24  | -104.4(14) | F17  | P1   | F3   | F36  | -110.2(12) |
| F17  | P1   | F1   | F23  | -176.2(8)  | F14  | P1   | F3   | F37  | -76.9(19)  |
| F16  | P1   | F1   | F33  | -112.5(17) | F1   | P1   | F3   | F36  | 58.5(9)    |
| F14  | P1   | F1   | F33  | 174.2(17)  | F1   | P1   | F3   | F37  | -155.2(10) |
| F15  | P1   | F1   | F36  | 32.5(12)   | F13  | P1   | F3   | F37  | -83.4(14)  |
| F14  | P1   | F1   | F36  | -110.2(17) | F15  | P1   | F3   | F36  | -27.8(12)  |
| F16  | P1   | F1   | F36  | -36.9(11)  | F34  | P1   | F1   | F24  | 37.6(12)   |
| F17  | P1   | F1   | F33  | 24.0(15)   | F37  | P1   | F1   | F24  | 125.0(19)  |
| F13  | P1   | F1   | F33  | 94.4(19)   | F33  | P1   | F1   | F23  | 160(2)     |
| F13  | P1   | F1   | F36  | 170.0(14)  | F3   | P1   | F1   | F23  | 16.3(13)   |
| F15  | P1   | F1   | F33  | -43.1(16)  | F35  | P1   | F1   | F23  | -160.1(7)  |
| F17  | P1   | F1   | F36  | 99.6(14)   | F37  | P1   | F1   | F23  | -13.9(11)  |
| F16  | P1   | F2   | F13  | 155.9(10)  | F3   | P1   | F1   | F24  | 155.2(9)   |
| F17  | P1   | F2   | F14  | -148.6(9)  | F36  | P1   | F1   | F24  | -137(2)    |
| F13  | P1   | F2   | F14  | 134.5(17)  | F35  | P1   | F1   | F24  | -21.2(17)  |
| F17  | P1   | F2   | F13  | 76.9(16)   | F33  | P1   | F1   | F24  | -61.3(14)  |
| F1   | P1   | F2   | F14  | 70.2(8)    | F34  | P1   | F1   | F23  | -101.3(16) |
| F14  | P1   | F2   | F13  | -134.5(17) | F36  | P1   | F1   | F23  | 84.2(10)   |
| F1   | P1   | F2   | F13  | -64.2(8)   | F3   | P1   | F1   | F36  | -68(2)     |
| F16  | P1   | F2   | F14  | -69.6(12)  | F3   | P1   | F1   | F33  | -143.5(13) |
| F13  | P1   | F2   | F37  | -157.0(19) | F35  | P1   | F1   | F33  | 40(2)      |
| F13  | P1   | F2   | F34  | -72.4(14)  | F37  | P1   | F1   | F36  | -98.1(5)   |
| F14  | P1   | F2   | F37  | 68.5(9)    | F36  | P1   | F1   | F33  | -76(3)     |
| F16  | P1   | F2   | F34  | 83.5(16)   | F35  | P1   | F1   | F36  | 115.6(9)   |
| F17  | P1   | F2   | F37  | -80.1(10)  | F34  | P1   | F1   | F33  | 98.9(7)    |
| F17  | P1   | F2   | F34  | 5(2)       | F33  | P1   | F1   | F36  | 76(3)      |
| F1   | P1   | F2   | F37  | 138.7(13)  | F37  | P1   | F1   | F33  | -174(2)    |
| F1   | P1   | F2   | F34  | -136.6(18) | F34  | P1   | F1   | F36  | 174(2)     |
| F16  | P1   | F2   | F37  | -1.1(13)   | F34  | P1   | F2   | F14  | -153(2)    |
| F14  | P1   | F2   | F34  | 153(2)     | F35  | P1   | F2   | F14  | 170.2(7)   |
| F16  | P1   | F3   | F14  | 127(2)     | F37  | P1   | F2   | F14  | -68.5(9)   |
| F13  | P1   | F3   | F16  | -133.3(15) | F33  | P1   | F2   | F13  | -27.9(10)  |
| F14  | P1   | F3   | F16  | -127(2)    | F35  | P1   | F2   | F13  | 35.7(17)   |
| F17  | P1   | F3   | F14  | 113.0(15)  | F34  | P1   | F2   | F13  | 72.4(14)   |
| F15  | P1   | F3   | F16  | 68.5(15)   | F36  | P1   | F2   | F14  | 34.7(13)   |
| F1   | P1   | F3   | F14  | -78.3(17)  | F3   | P1   | F2   | F13  | -147.9(10) |
| F1   | P1   | F3   | F16  | 154.8(9)   | F36  | P1   | F2   | F13  | -100(2)    |
| F13  | P1   | F3   | F14  | -6.5(19)   | F37  | P1   | F2   | F13  | 157.0(19)  |
| F17  | P1   | F3   | F16  | -13.9(18)  | F3   | P1   | F2   | F14  | -13.4(14)  |
| F15  | P1   | F3   | F14  | -164.6(10) | F33  | P1   | F2   | F14  | 106.6(16)  |
| F14  | P1   | F3   | F27  | 178.4(18)  | F3   | P1   | F2   | F37  | 55.1(18)   |
| F16  | P1   | F3   | F27  | -54.8(7)   | F35  | P1   | F2   | F34  | -37(2)     |
| F13  | P1   | F3   | F23  | 52.0(19)   | F37  | P1   | F2   | F34  | 85(3)      |
| F16  | P1   | F3   | F23  | -175(2)    | F36  | P1   | F2   | F37  | 103.2(5)   |
| F13  | P1   | F3   | F27  | 171.9(9)   | F3   | P1   | F2   | F34  | 139.8(13)  |
| F17  | P1   | F3   | F23  | 171.4(13)  | F35  | P1   | F2   | F37  | -121.3(8)  |
| F36  | P1   | F2   | F34  | -172(3)    | F37  | P1   | F3   | F23  | 135(2)     |

|     |    |    |     |            |     |    |    |     |            |
|-----|----|----|-----|------------|-----|----|----|-----|------------|
| F33 | P1 | F2 | F37 | 175.1(19)  | F33 | P1 | F3 | F27 | 73.4(13)   |
| F33 | P1 | F2 | F34 | -100.2(8)  | F34 | P1 | F3 | F23 | 100.0(15)  |
| F34 | P1 | F2 | F37 | -85(3)     | F36 | P1 | F3 | F23 | -78(2)     |
| F37 | P1 | F3 | F14 | 76.9(19)   | F34 | P1 | F3 | F27 | -140.1(10) |
| F37 | P1 | F3 | F16 | -50.0(10)  | F37 | P1 | F3 | F27 | -104.8(12) |
| F33 | P1 | F3 | F16 | 128.2(14)  | F36 | P1 | F3 | F27 | 41.5(7)    |
| F33 | P1 | F3 | F14 | -104.9(13) | F33 | P1 | F3 | F23 | -46.5(17)  |
| F36 | P1 | F3 | F16 | 96.3(13)   | F33 | P1 | F3 | F36 | 31.9(17)   |
| F34 | P1 | F3 | F14 | 41.6(17)   | F37 | P1 | F3 | F36 | -146.3(17) |
| F34 | P1 | F3 | F16 | -85.3(16)  | F34 | P1 | F3 | F37 | -35.3(19)  |
| F36 | P1 | F3 | F14 | -137(2)    | F36 | P1 | F3 | F37 | 146.3(17)  |
| F34 | P1 | F3 | F36 | 178.4(6)   | F33 | P1 | F3 | F37 | 178.2(8)   |

11-y,-1+x-y,+z; 22+y-x,1-x,+z; 31+y-x,1-x,+z; 41-y,+x-y,+z; 51/3+y,-1/3+x,7/6-z; 64/3-x,2/3-x+y,7/6-z; 71/3-y+x,2/3-y,7/6-z

**Table S7.**Hydrogen Fractional Atomic Coordinates ( $\times 10^4$ ) and Equivalent Isotropic Displacement Parameters ( $\text{\AA}^2 \times 10^3$ ) for compound **1**. *Ueq* is defined as 1/3 of the trace of the orthogonalized *Uij*.

| Atom | x          | y        | z       | <i>Ueq</i> |
|------|------------|----------|---------|------------|
| H2A  | 7900(30)   | 1180(30) | 5440(6) | 54         |
| H2B  | 6950(30)   | -340(30) | 5432(6) | 54         |
| H3A  | 8760(30)   | 2150(30) | 6310(7) | 66         |
| H3B  | 10300(30)  | 3040(30) | 6285(7) | 66         |
| H    | 11500(500) | 3333.33  | 5833.33 | 700(600)   |

**Table S8.**Atomic Occupancies for all atoms that are not fully occupied in compound **1**.

| Atom | Occupancy |
|------|-----------|
| F1   | 0.3333    |
| F2   | 0.3333    |
| F3   | 0.3333    |
| H    | 0.3333    |

**Table S9.** Fractional Atomic Coordinates ( $\times 10^4$ ) and Equivalent Isotropic Displacement Parameters ( $\text{\AA}^2 \times 10^3$ ) for compound **2**.  $U_{eq}$  is defined as 1/3 of the trace of the orthogonalized  $U_{ij}$ .

| Atom | x           | y         | z          | $U_{eq}$ |
|------|-------------|-----------|------------|----------|
| N1   | -2238.8(19) | 3227(2)   | 6549.4(17) | 23.5(5)  |
| N2   | 2041(2)     | 1075(3)   | 9199(2)    | 35.7(7)  |
| N3   | 5388(2)     | 1005(2)   | 4265(2)    | 36.3(7)  |
| N4   | 4620.1(19)  | 3281(2)   | 9777.7(17) | 23.0(5)  |
| N5   | 5668(2)     | 1560(3)   | 9991(2)    | 36.6(7)  |
| N6   | 3575.1(19)  | 1255(2)   | 3902.7(17) | 24.0(5)  |
| C1   | -1273(2)    | 3700(3)   | 6760.8(19) | 23.0(6)  |
| C2   | 3616(2)     | 3706(3)   | 9556.5(19) | 22.1(6)  |
| C3   | -496(2)     | 1740(3)   | 6912(2)    | 25.2(6)  |
| N7   | 4057(2)     | 4899(2)   | 4032(2)    | 36.3(7)  |
| N8   | 2723.6(19)  | 3021(2)   | 9349.4(18) | 24.6(5)  |
| N9   | -3245(2)    | 1484(2)   | 6351(2)    | 32.1(6)  |
| N10  | -1444(2)    | 1206(2)   | 6709.8(17) | 26.3(6)  |
| N11  | -1126(2)    | 4898(2)   | 6796.1(19) | 32.0(6)  |
| N12  | 3867.4(19)  | 1254(2)   | 9598.9(18) | 25.4(5)  |
| C4   | 4688(2)     | 2050(3)   | 9781.5(19) | 22.5(6)  |
| C5   | 3897(2)     | 3689(3)   | 3980(2)    | 24.1(6)  |
| C6   | 4548(2)     | 1765(3)   | 4103(2)    | 23.2(6)  |
| N13  | 3492(2)     | 4927(2)   | 9536(2)    | 32.6(6)  |
| N14  | 2879.0(19)  | 3300(2)   | 3766.8(17) | 24.3(5)  |
| N15  | 1779(2)     | 1618(3)   | 3548(2)    | 36.0(7)  |
| N16  | -383.0(19)  | 2979(2)   | 6949.8(17) | 25.9(5)  |
| N17  | 384(2)      | 1080(3)   | 7090(2)    | 37.6(7)  |
| N18  | 4765.0(19)  | 2970(2)   | 4147.7(18) | 24.9(5)  |
| C7   | 2904(2)     | 1801(3)   | 9393(2)    | 23.6(6)  |
| C8   | -2284(2)    | 1989(3)   | 6541(2)    | 23.3(6)  |
| C9   | 2777(2)     | 2074(3)   | 3743(2)    | 23.0(6)  |
| P1   | 3767.5(6)   | 2503.1(7) | 6768.4(5)  | 26.9(2)  |
| F1   | 3656(7)     | 3693(6)   | 7349(6)    | 56.5(19) |
| F3   | 2752(6)     | 1912(9)   | 7006(8)    | 61(2)    |
| F2   | 3897(10)    | 1341(7)   | 6207(7)    | 76(2)    |
| F4   | 4780(6)     | 3137(8)   | 6557(9)    | 71(2)    |
| F5   | 4528(6)     | 1900(7)   | 7643(5)    | 58.5(19) |
| F6   | 3033(9)     | 3168(9)   | 5918(6)    | 74(2)    |
| F1B  | 3943(15)    | 3538(13)  | 7512(9)    | 70(4)    |
| F2B  | 3579(11)    | 1424(11)  | 6032(9)    | 54(3)    |
| F3B  | 2824(9)     | 3251(13)  | 6137(10)   | 57(3)    |
| F4B  | 4702(9)     | 1718(13)  | 7357(13)   | 69(3)    |
| F5B  | 2947(10)    | 1902(13)  | 7275(8)    | 44(3)    |
| F6B  | 4587(10)    | 3037(12)  | 6225(9)    | 54(3)    |
| O1   | 1509(4)     | 4048(6)   | 7557(5)    | 54.2(18) |
| O1B  | 1371(10)    | 4447(11)  | 7073(11)   | 48(3)    |

**Table S10.** Anisotropic Displacement Parameters ( $\times 10^4$ ) for compound **2**. The anisotropic displacement factor exponent takes the form:  $-2p_2/h2a^*2 \times U11 + \dots + 2hka^* \times b^* \times U12$

| Atom | $U11$    | $U22$    | $U33$    | $U23$    | $U13$   | $U12$    |
|------|----------|----------|----------|----------|---------|----------|
| N1   | 24.3(11) | 12.1(11) | 32.5(12) | -1.1(9)  | 3.9(9)  | 0.5(9)   |
| N2   | 24.8(13) | 14.3(13) | 65.1(18) | -6.0(12) | 5.0(12) | -4.9(10) |
| N3   | 27.3(13) | 12.6(13) | 64.7(18) | -0.7(12) | 2.2(12) | 3.8(10)  |
| N4   | 21.7(11) | 11.3(11) | 34.5(12) | -1.3(9)  | 4.1(9)  | -1.2(8)  |
| N5   | 23.1(13) | 15.4(13) | 68.2(19) | -1.1(12) | 5.1(12) | 1.2(10)  |
| N6   | 25.0(11) | 11.5(11) | 34.2(12) | -1.2(9)  | 4.6(9)  | -0.5(9)  |
| C1   | 27.4(13) | 14.5(13) | 26.2(12) | -0.5(10) | 4.4(10) | 0.2(10)  |
| C2   | 24.8(12) | 12.3(12) | 28.4(12) | 0.5(10)  | 4.7(10) | -1.0(10) |
| C3   | 29.6(13) | 18.3(13) | 26.5(12) | 0.9(10)  | 4.7(10) | 3.1(11)  |
| N7   | 28.2(13) | 7.2(12)  | 68.9(19) | -2.4(12) | 2.4(13) | -1.2(10) |
| N8   | 22.7(11) | 13.1(11) | 36.0(12) | -1.1(9)  | 2.8(9)  | 0.0(9)   |

|     |          |          |          |          |         |          |
|-----|----------|----------|----------|----------|---------|----------|
| N9  | 26.3(13) | 14.0(12) | 53.3(16) | -2.5(11) | 4.4(11) | -3.8(10) |
| N10 | 29.7(12) | 13.5(11) | 34.7(12) | -0.2(9)  | 6.0(10) | 1.5(9)   |
| N11 | 30.9(13) | 11.1(13) | 50.6(16) | -1.7(10) | 3.1(12) | -3.4(10) |
| N12 | 24.5(11) | 13.0(11) | 37.9(12) | -1.6(9)  | 5.9(9)  | -1.0(9)  |
| C4  | 23.8(12) | 14.2(12) | 29.0(12) | -1.3(10) | 5.3(10) | 1.0(10)  |
| C5  | 26.0(12) | 13.6(13) | 31.9(13) | 0.1(10)  | 5.4(10) | -0.4(10) |
| C6  | 25.6(13) | 13.6(13) | 29.1(12) | 0.3(10)  | 4.1(10) | 0.1(10)  |
| N13 | 28.2(13) | 9.8(12)  | 55.7(16) | 1.4(11)  | 1.9(12) | -0.3(10) |
| N14 | 23.5(11) | 11.5(11) | 36.4(12) | 0.1(9)   | 4.2(9)  | 0.6(9)   |
| N15 | 23.1(13) | 14.3(13) | 68.4(19) | -1.2(12) | 6.3(12) | -1.6(10) |
| N16 | 23.2(11) | 17.1(12) | 34.8(12) | 0.7(9)   | 1.6(9)  | -1.1(9)  |
| N17 | 32.1(14) | 22.6(14) | 54.3(17) | 0.4(12)  | 2.8(12) | 10.0(11) |
| N18 | 23.4(11) | 12.9(11) | 36.9(12) | -1.0(9)  | 4.4(9)  | -1.7(9)  |
| C7  | 24.5(12) | 15.3(13) | 30.1(13) | -1.8(10) | 4.8(10) | -0.3(10) |
| C8  | 27.8(13) | 13.4(12) | 27.9(12) | -0.7(10) | 5.5(10) | 0.5(10)  |
| C9  | 26.2(12) | 12.6(12) | 30.2(13) | -0.7(10) | 6.7(10) | -1.2(10) |
| P1  | 26.5(4)  | 11.1(4)  | 41.3(5)  | 0.2(3)   | 4.4(3)  | 1.4(3)   |
| F1  | 59(3)    | 27(3)    | 78(4)    | -25(2)   | 5(3)    | -2(2)    |
| F3  | 45(3)    | 53(3)    | 83(4)    | -7(3)    | 13(3)   | -19(2)   |
| F2  | 90(5)    | 52(3)    | 86(4)    | -28(3)   | 17(3)   | 27(3)    |
| F4  | 58(3)    | 71(3)    | 92(5)    | 12(3)    | 33(3)   | -14(2)   |
| F5  | 64(3)    | 56(3)    | 48(3)    | 10(2)    | -1(2)   | 18(2)    |
| F6  | 82(4)    | 69(3)    | 61(3)    | 11(3)    | 0(3)    | 29(3)    |
| F1B | 80(6)    | 59(5)    | 63(5)    | -20(4)   | -2(4)   | -10(4)   |
| F2B | 55(5)    | 42(4)    | 63(4)    | -21(3)   | 11(3)   | -8(3)    |
| F3B | 48(4)    | 55(4)    | 63(5)    | 21(4)    | 3(3)    | 17(3)    |
| F4B | 60(4)    | 62(5)    | 76(5)    | 21(4)    | 2(4)    | 22(3)    |
| F5B | 49(4)    | 44(4)    | 41(4)    | 3(3)     | 16(3)   | -9(3)    |
| F6B | 52(4)    | 53(4)    | 58(5)    | 4(3)     | 19(3)   | -16(3)   |
| O1  | 39(2)    | 60(3)    | 61(3)    | -12(3)   | 8(2)    | -4(2)    |
| O1B | 47(4)    | 39(5)    | 58(5)    | -7(4)    | 15(4)   | -8(3)    |

**Table S11.** Bond Lengths in Å for compound 2.

| Atom | Atom | Length/Å | Atom | Atom | Length/Å |
|------|------|----------|------|------|----------|
| N1   | C1   | 1.317(4) | N12  | C4   | 1.346(4) |
| N1   | C8   | 1.351(4) | N12  | C7   | 1.347(4) |
| N2   | C7   | 1.341(4) | C5   | N14  | 1.345(4) |
| N3   | C6   | 1.340(4) | C5   | N18  | 1.341(4) |
| N4   | C2   | 1.342(4) | C6   | N18  | 1.342(4) |
| N4   | C4   | 1.345(4) | N14  | C9   | 1.343(4) |
| N5   | C4   | 1.341(4) | N15  | C9   | 1.347(4) |
| N6   | C6   | 1.341(4) | P1   | F1   | 1.594(5) |
| N6   | C9   | 1.341(4) | P1   | F3   | 1.578(6) |
| C1   | N11  | 1.319(4) | P1   | F2   | 1.559(6) |
| C1   | N16  | 1.365(4) | P1   | F4   | 1.578(6) |
| C2   | N8   | 1.347(4) | P1   | F5   | 1.595(5) |
| C2   | N13  | 1.341(4) | P1   | F6   | 1.585(6) |
| C3   | N10  | 1.323(4) | P1   | F1B  | 1.575(9) |
| C3   | N16  | 1.359(4) | P1   | F2B  | 1.602(8) |
| C3   | N17  | 1.318(4) | P1   | F3B  | 1.586(8) |
| N7   | C5   | 1.335(4) | P1   | F4B  | 1.573(8) |
| N8   | C7   | 1.349(4) | P1   | F5B  | 1.592(8) |
| N9   | C8   | 1.325(4) | P1   | F6B  | 1.599(8) |
| N10  | C8   | 1.357(4) |      |      |          |



**Table S12.** Bond Angles in ° for compound 2.

| Atom | Atom | Atom | Angle/°  | Atom | Atom | Atom | Angle/°  |
|------|------|------|----------|------|------|------|----------|
| C1   | N1   | C8   | 115.5(3) | N6   | C9   | N14  | 126.3(3) |
| C2   | N4   | C4   | 113.8(2) | N6   | C9   | N15  | 116.6(3) |
| C6   | N6   | C9   | 113.7(2) | N14  | C9   | N15  | 117.1(3) |
| N1   | C1   | N11  | 121.1(3) | F1   | P1   | F5   | 89.6(4)  |
| N1   | C1   | N16  | 121.8(3) | F3   | P1   | F1   | 90.9(5)  |
| N11  | C1   | N16  | 117.1(3) | F3   | P1   | F5   | 91.2(4)  |
| N4   | C2   | N8   | 126.1(3) | F3   | P1   | F6   | 90.2(5)  |
| N13  | C2   | N4   | 116.9(3) | F2   | P1   | F1   | 179.1(4) |
| N13  | C2   | N8   | 117.0(3) | F2   | P1   | F3   | 89.8(5)  |
| N10  | C3   | N16  | 122.1(3) | F2   | P1   | F4   | 92.4(5)  |
| N17  | C3   | N10  | 120.8(3) | F2   | P1   | F5   | 89.8(4)  |
| N17  | C3   | N16  | 117.0(3) | F2   | P1   | F6   | 92.7(5)  |
| C2   | N8   | C7   | 114.0(2) | F4   | P1   | F1   | 86.8(5)  |
| C3   | N10  | C8   | 114.9(3) | F4   | P1   | F3   | 177.7(5) |
| C4   | N12  | C7   | 113.6(3) | F4   | P1   | F5   | 88.5(4)  |
| N4   | C4   | N12  | 126.5(3) | F4   | P1   | F6   | 89.9(5)  |
| N5   | C4   | N4   | 117.1(3) | F6   | P1   | F1   | 87.9(5)  |
| N5   | C4   | N12  | 116.4(3) | F6   | P1   | F5   | 177.1(5) |
| N7   | C5   | N14  | 117.0(3) | F1B  | P1   | F2B  | 178.4(8) |
| N7   | C5   | N18  | 117.1(3) | F1B  | P1   | F3B  | 91.4(7)  |
| N18  | C5   | N14  | 125.9(3) | F1B  | P1   | F5B  | 86.9(8)  |
| N3   | C6   | N6   | 117.3(3) | F1B  | P1   | F6B  | 96.3(8)  |
| N3   | C6   | N18  | 116.5(3) | F3B  | P1   | F2B  | 89.3(7)  |
| N6   | C6   | N18  | 126.2(3) | F3B  | P1   | F5B  | 90.0(6)  |
| C9   | N14  | C5   | 113.8(2) | F3B  | P1   | F6B  | 90.4(6)  |
| C3   | N16  | C1   | 119.1(3) | F4B  | P1   | F1B  | 91.2(7)  |
| C5   | N18  | C6   | 114.0(2) | F4B  | P1   | F2B  | 88.1(6)  |
| N2   | C7   | N8   | 116.5(3) | F4B  | P1   | F3B  | 177.3(7) |
| N2   | C7   | N12  | 117.6(3) | F4B  | P1   | F5B  | 90.5(7)  |
| N12  | C7   | N8   | 125.9(3) | F4B  | P1   | F6B  | 88.9(7)  |
| N1   | C8   | N10  | 126.6(3) | F5B  | P1   | F2B  | 91.6(7)  |
| N9   | C8   | N1   | 117.0(3) | F5B  | P1   | F6B  | 176.7(7) |
| N9   | C8   | N10  | 116.4(3) | F6B  | P1   | F2B  | 85.1(7)  |

**Table S13.** Torsion Angles in ° for compound 2.

| Atom | Atom | Atom | Atom | Angle/°   | Atom | Atom | Atom | Atom | Angle/°   |
|------|------|------|------|-----------|------|------|------|------|-----------|
| N1   | C1   | N16  | C3   | 0.5(4)    | C4   | N4   | C2   | N8   | 0.0(4)    |
| N3   | C6   | N18  | C5   | 180.0(3)  | C4   | N4   | C2   | N13  | -179.7(3) |
| N4   | C2   | N8   | C7   | 1.0(4)    | C4   | N12  | C7   | N2   | 179.8(3)  |
| N6   | C6   | N18  | C5   | 0.7(4)    | C4   | N12  | C7   | N8   | 0.9(4)    |
| C1   | N1   | C8   | N9   | 178.5(3)  | C5   | N14  | C9   | N6   | -0.4(4)   |
| C1   | N1   | C8   | N10  | -1.3(4)   | C5   | N14  | C9   | N15  | 179.0(3)  |
| C2   | N4   | C4   | N5   | 179.6(3)  | C6   | N6   | C9   | N14  | 0.1(4)    |
| C2   | N4   | C4   | N12  | -0.7(4)   | C6   | N6   | C9   | N15  | -179.3(3) |
| C2   | N8   | C7   | N2   | 179.6(3)  | N13  | C2   | N8   | C7   | -179.3(3) |
| C2   | N8   | C7   | N12  | -1.5(4)   | N14  | C5   | N18  | C6   | -1.1(4)   |
| C3   | N10  | C8   | N1   | 0.9(4)    | N16  | C3   | N10  | C8   | 0.2(4)    |
| C3   | N10  | C8   | N9   | -178.8(3) | N17  | C3   | N10  | C8   | -179.9(3) |
| N7   | C5   | N14  | C9   | -178.8(3) | N17  | C3   | N16  | C1   | 179.3(3)  |
| N7   | C5   | N18  | C6   | 178.7(3)  | N18  | C5   | N14  | C9   | 0.9(4)    |
| N10  | C3   | N16  | C1   | -0.9(4)   | C7   | N12  | C4   | N4   | 0.3(4)    |
| N11  | C1   | N16  | C3   | -179.3(3) | C7   | N12  | C4   | N5   | -179.9(3) |
| C9   | N6   | C6   | N3   | -179.5(3) | C8   | N1   | C1   | N11  | -179.7(3) |
| C9   | N6   | C6   | N18  | -0.2(4)   | C8   | N1   | C1   | N16  | 0.5(4)    |

**Table S14.**Hydrogen Fractional Atomic Coordinates ( $\times 10^4$ ) and Equivalent Isotropic Displacement Parameters ( $\text{\AA}^2 \times 10^3$ ) for compound **2**.  $U_{eq}$  is defined as  $1/3$  of the trace of the orthogonalized  $U_{ij}$ .

| Atom | x         | y         | z        | $U_{eq}$ |
|------|-----------|-----------|----------|----------|
| H2A  | 2114.58   | 291.13    | 9208.79  | 43       |
| H2B  | 1413.99   | 1394.43   | 9064.25  | 43       |
| H3A  | 5290.78   | 224.68    | 4238.48  | 44       |
| H3B  | 6024.67   | 1298.9    | 4395.12  | 44       |
| H5A  | 6219.05   | 2029.19   | 10115.25 | 44       |
| H5B  | 5746.22   | 776.09    | 10001.02 | 44       |
| H7A  | 4695.51   | 5186.61   | 4168.56  | 44       |
| H7B  | 3521.24   | 5391.83   | 3929.48  | 44       |
| H9A  | -3804.12  | 1940.8    | 6240.95  | 38       |
| H9B  | -3310.03  | 698.32    | 6338.52  | 38       |
| H11A | -1665.94  | 5383.97   | 6680.17  | 38       |
| H11B | -490.02   | 5193.21   | 6935.13  | 38       |
| H13A | 4041.5    | 5398.65   | 9660.82  | 39       |
| H13B | 2862.23   | 5239.63   | 9397.09  | 39       |
| H15A | 1679.84   | 837.13    | 3530.7   | 43       |
| H15B | 1241.22   | 2106.86   | 3440.19  | 43       |
| H16  | 241.26    | 3304.7    | 7090.65  | 31       |
| H17A | 347.41    | 292.67    | 7075.07  | 45       |
| H17B | 995.27    | 1437.64   | 7220.96  | 45       |
| H1A  | 1920(50)  | 4070(80)  | 7210(40) | 81       |
| H1B  | 1740(60)  | 3670(70)  | 8030(30) | 81       |
| H1BA | 1180(130) | 4760(110) | 6570(40) | 72       |
| H1BB | 1530(140) | 4930(100) | 7500(60) | 72       |

**Table S15.**Atomic Occupancies for all atoms that are not fully occupied in compound **2**.

| Atom | Occupancy |
|------|-----------|
| F1   | 0.62(2)   |
| F3   | 0.62(2)   |
| F2   | 0.62(2)   |
| F4   | 0.62(2)   |
| F5   | 0.62(2)   |
| F6   | 0.62(2)   |
| F1B  | 0.38(2)   |
| F2B  | 0.38(2)   |
| F3B  | 0.38(2)   |
| F4B  | 0.38(2)   |
| F5B  | 0.38(2)   |
| F6B  | 0.38(2)   |
| O1   | 0.694(15) |
| H1A  | 0.694(15) |
| H1B  | 0.694(15) |
| O1B  | 0.306(15) |
| H1BA | 0.306(15) |
| H1BB | 0.306(15) |

**Table S16.** Hydrogen bonds for compound 1.

| Donor-H | Acceptor | [ARU]      | D···A/Å   | D-H···A/° |
|---------|----------|------------|-----------|-----------|
| N2-H2A  | F3       | [1555.01]  | 3.131(19) | 132(2)    |
| N2-H2A  | F1       | [17656.01] | 3.272(15) | 162(3)'   |
| N2-H2A  | F2       | [18556.01] | 2.965(11) | 133(3)''  |
| N2-H2B  | N4       | [16536.03] | 3.065(2)  | 172(2)    |
| N3-H3A  | F3       | [1555.01]  | 3.02(2)   | 139(2)    |
| N3-H3A  | F1       | [2655.01]  | 3.020(14) | 141(2)'   |
| N3-H3A  | F2       | [3665.01]  | 3.156(13) | 163(2)''  |
| N3-H3B  | N1       | [16646.02] | 3.084(2)  | 172(3)    |

Translation of ARU-Code to CIF and Equivalent Position Code

$$\begin{aligned}
 [2655.] &= [2\_655] = 1-y,x-y,z; & [3665.] &= [3\_665] = 1-x+y,1-x,z; \\
 [17656.] &= [18\_655] = 4/3-x,2/3-x+y,7/6-z; & [18556.] &= [17\_555] = 1/3+x-y,2/3-y,7/6-z; \\
 [16536.] &= [16\_535] = 1/3+y,-4/3+x,7/6-z; & [16646.] &= [16\_645] = 4/3+y,-1/3+x,7/6-z.
 \end{aligned}$$

**Table S17.** Hydrogen bonds for compound 2.

| Donor-H  | Acceptor | [ARU]     | D···A/Å   | D-H···A/° |
|----------|----------|-----------|-----------|-----------|
| O1-H1A   | F1       | [1555.01] | 2.890(11) | 135(6)    |
| O1-H1B   | N8       | [1555.03] | 3.018(8)  | 164(6)    |
| N2-H2A   | F6       | [2546.01] | 3.174(10) | 169       |
| N2-H2B   | N18      | [4455.04] | 3.101(4)  | 162       |
| N3-H3A   | F2       | [3656.01] | 2.868(9)  | 135       |
| N3-H3B   | N8       | [4554.03] | 3.171(4)  | 165       |
| N5-H5A   | F6       | [4555.01] | 3.058(12) | 136       |
| N5-H5B   | N12      | [3657.03] | 3.160(4)  | 166       |
| N7-H7A   | F4       | [3666.01] | 2.878(9)  | 123       |
| N7-H7B   | N1       | [3566.02] | 3.079(3)  | 170       |
| N9-H9A   | F4       | [1455.01] | 3.198(9)  | 158       |
| N9-H9B   | N6       | [3556.04] | 3.028(3)  | 172       |
| N11-H11A | N14      | [3566.04] | 2.965(3)  | 171       |
| N11-H11B | F5       | [2556.01] | 2.985(8)  | 144       |
| N13-H13A | N4       | [3667.03] | 3.104(3)  | 169       |
| N13-H13B | F2       | [2556.01] | 3.393(12) | 171       |
| N15-H15A | N10      | [3556.02] | 3.121(4)  | 172       |
| N15-H15B | F5       | [4454.01] | 3.324(8)  | 160       |
| N16-H16A | O1       | [1555.05] | 2.666(6)  | 171       |
| N17-H17A | F1       | [2546.01] | 2.921(8)  | 139       |
| N17-H17B | F3       | [1555.01] | 3.221(9)  | 154       |

Translation of ARU-Code to CIF and Equivalent Position Code

$$\begin{aligned}
 [3566.] &= [3\_566] = -x,1-y,1-z; & [4455.] &= [4\_566] = -1/2+x,1/2-y,1/2+z; \\
 [1455.] &= [1\_455] = -1+x,y,z; & [3556.] &= [3\_556] = -x,-y,1-z; \\
 [2556.] &= [2\_556] = 1/2-x,1/2+y,3/2-z; & [2546.] &= [2\_546] = 1/2-x,-1/2+y,3/2-z; \\
 [3667.] &= & [3\_667] &= 1-x,1-y,2-z.
 \end{aligned}$$

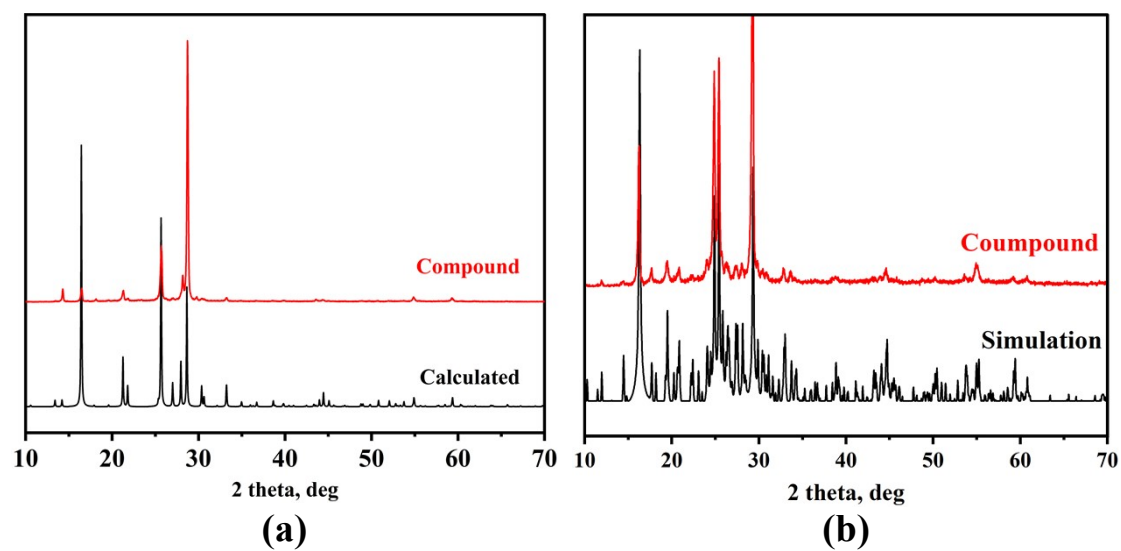

**Fig. S1.** Experimental and calculated XRD patterns of (a) compound 1, (b) compound 2.

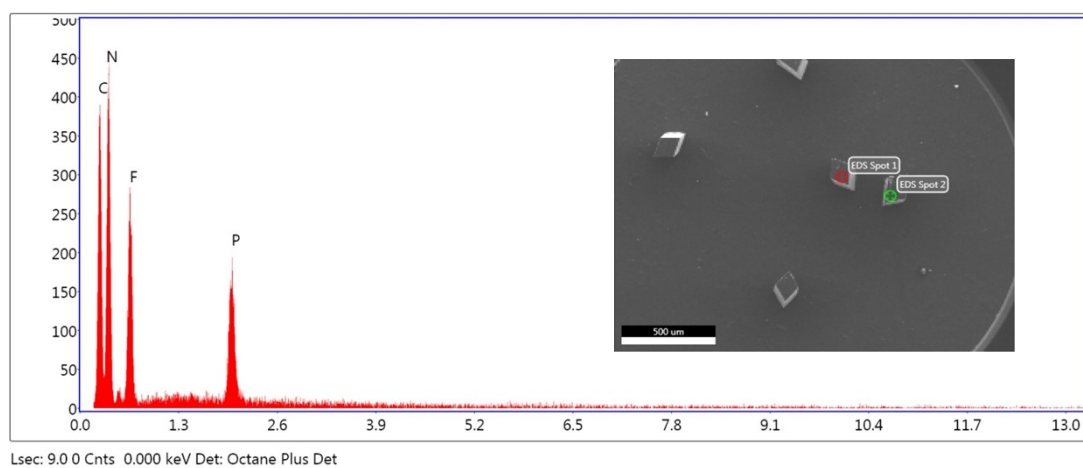

**Fig. S2.** EDS spectrum of compound 1.

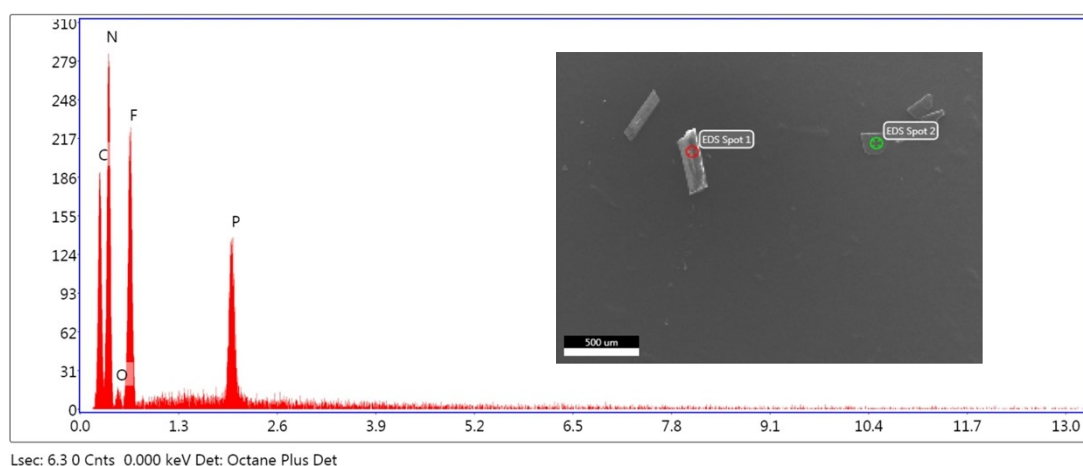

**Fig. S3.** EDS spectrum of compound 2.

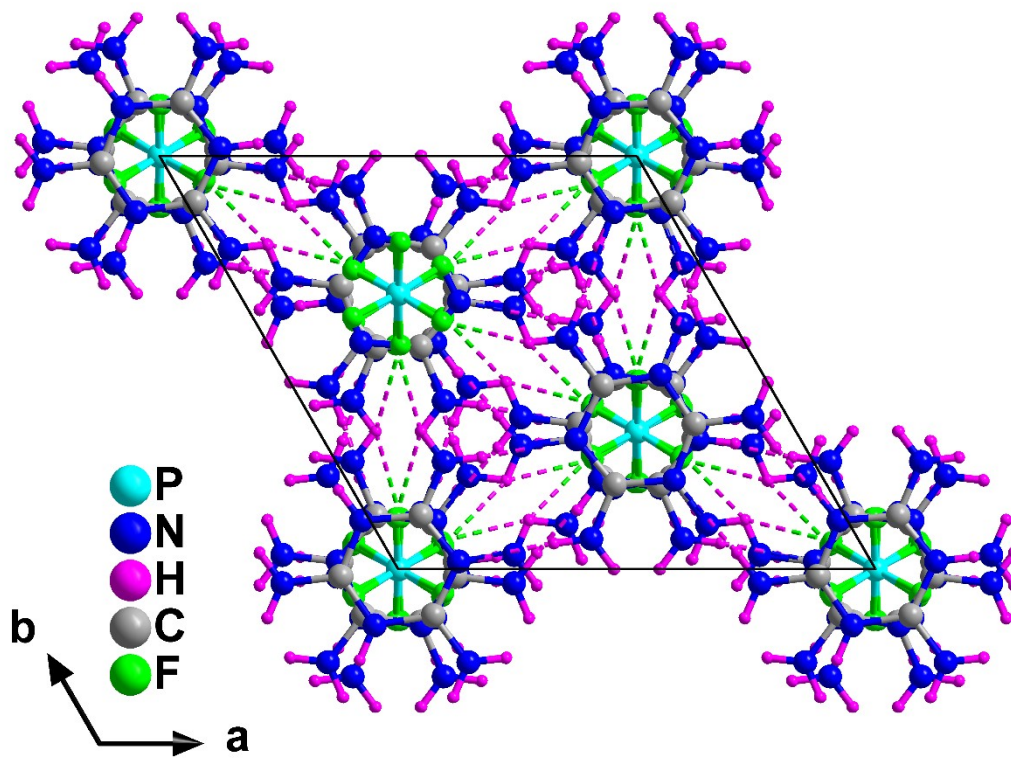

Fig. S4. The H-bond of compound 1 view along  $c$  axis.

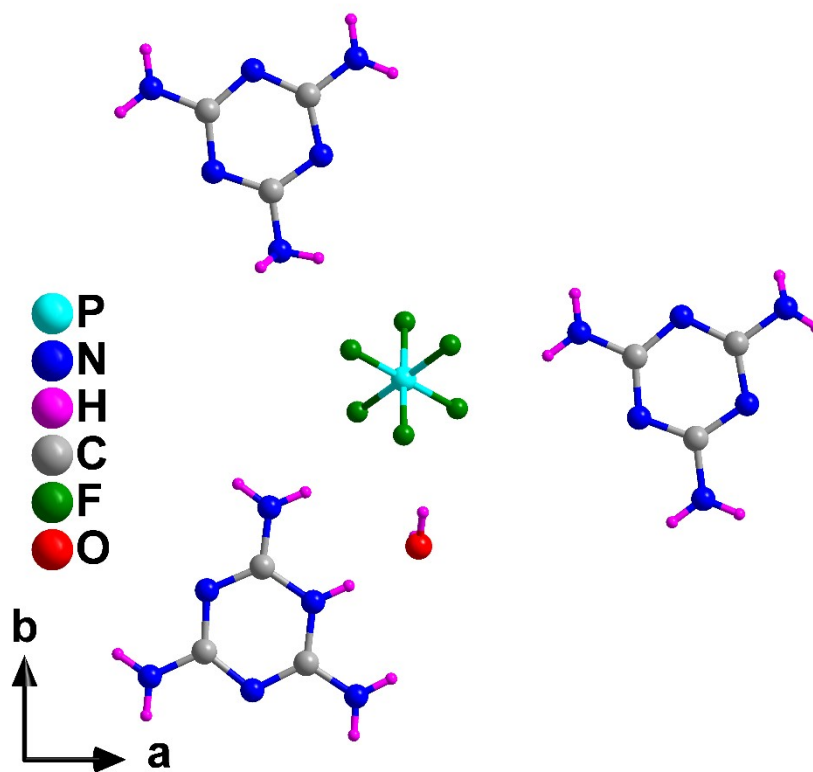

Fig. S5. The asymmetric unit of compound 2.

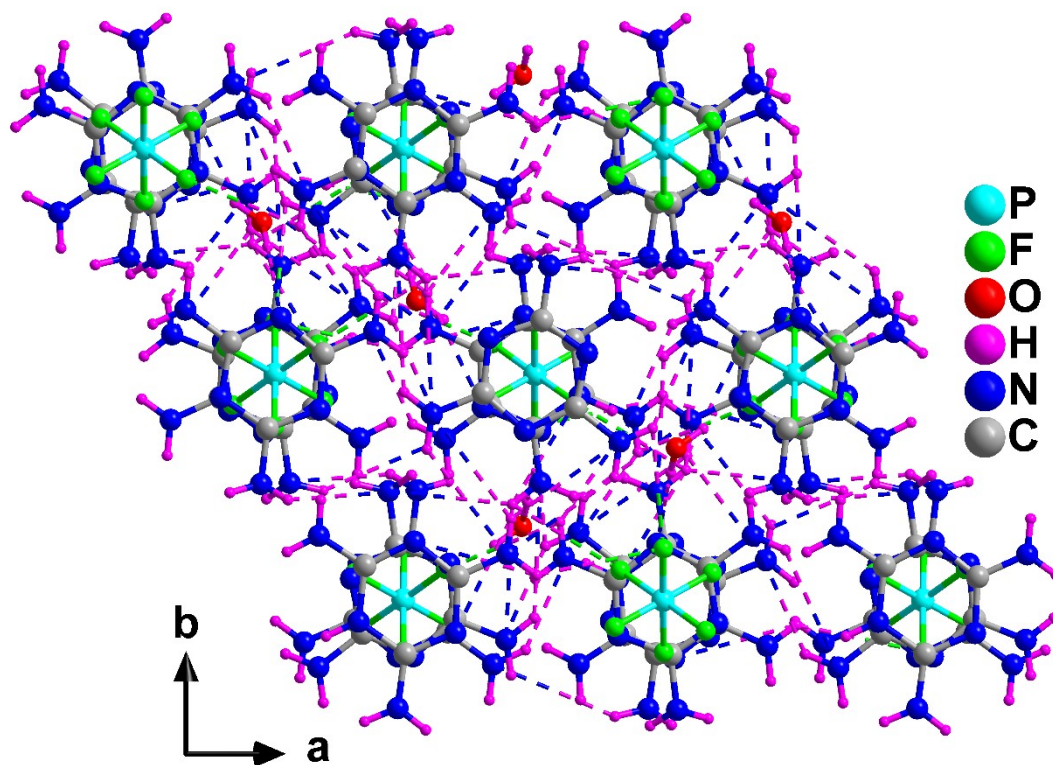

Fig. S6. The H-bond of compound 2 views along as  $c$  axis.

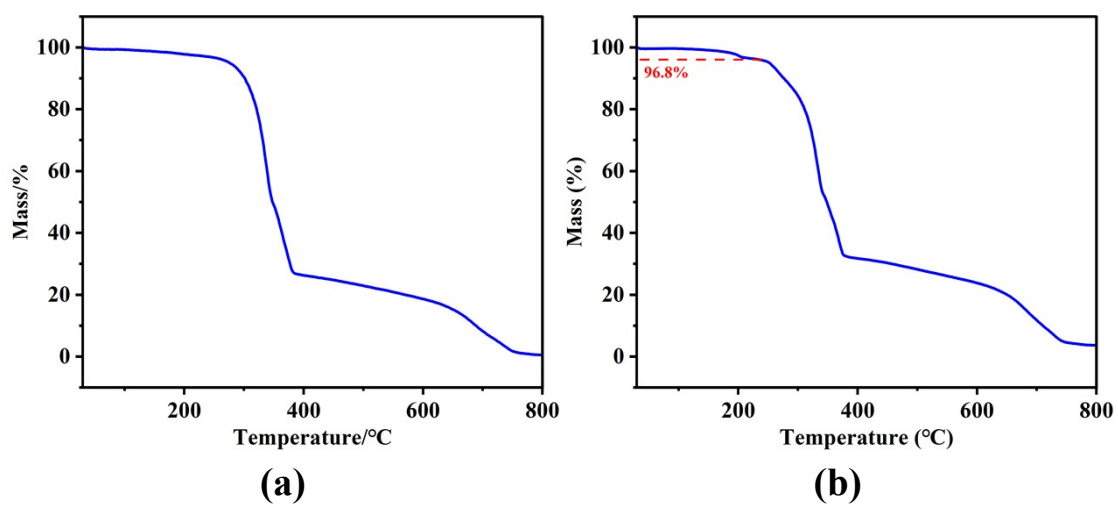

Fig. S7. Thermal analyses for compounds 1 (a) and 2 (b).

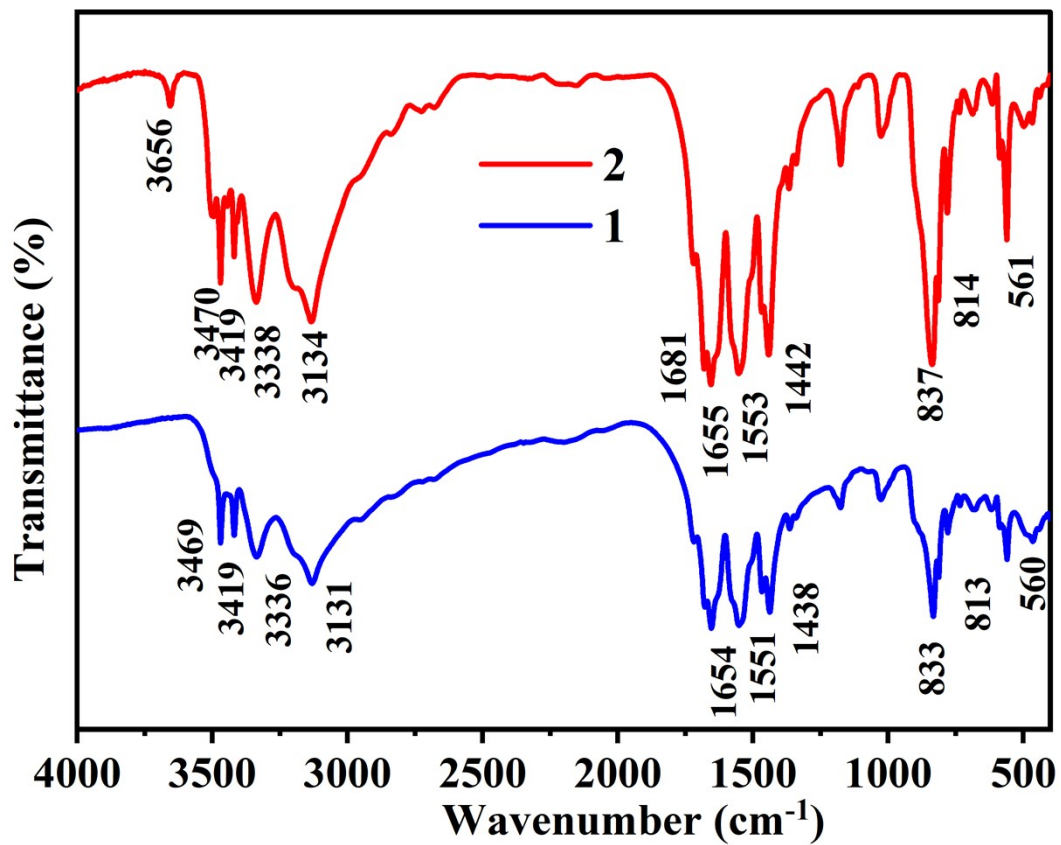

Fig. S8. The IR spectrum of compounds 1 and 2.
